# Supplementary material
Source: publisher figshare collection journal article supplement (https://springernature.figshare.com/ndownloader/files/14529554)
Supplement: Supplementary file [file 14529554]

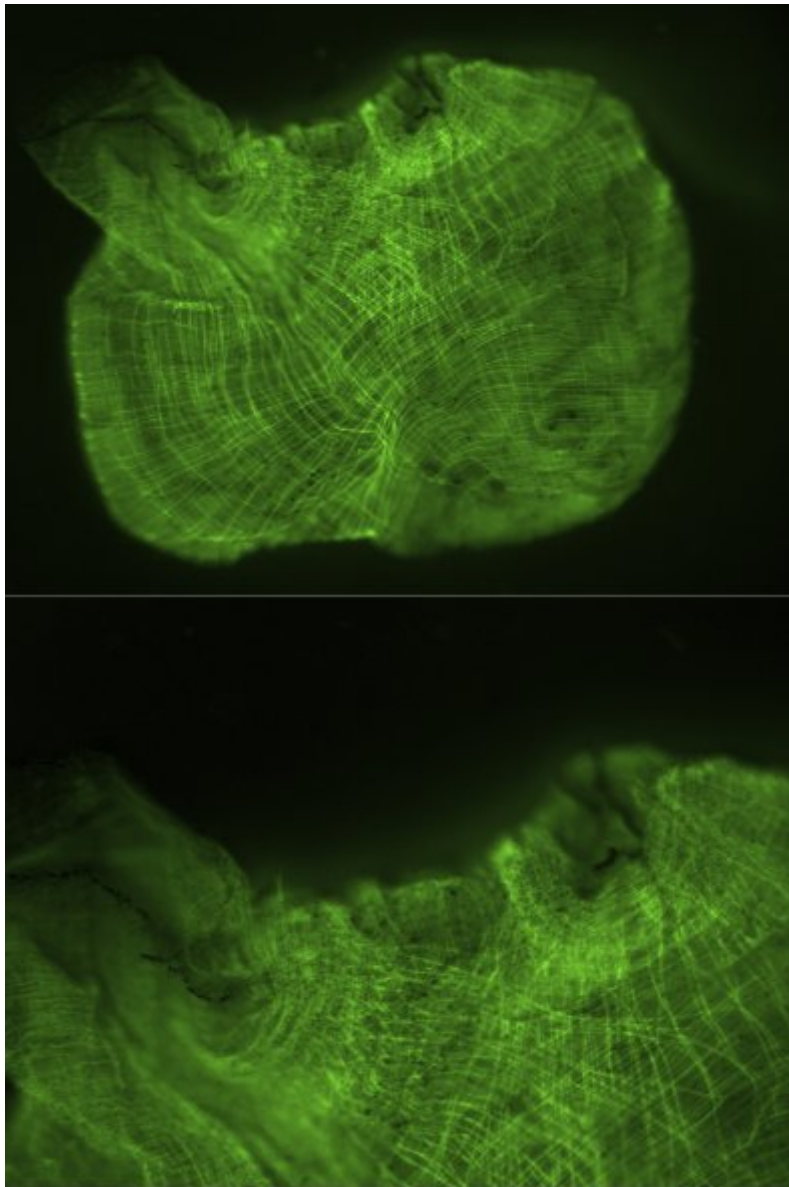

Supp. Fig. 11. Zooid of *Poliandrocarpa zorritensis* stained with phalloidin showing the muscle fibers and close up of intersiphonal zone.
